# Supplementary material for: Clinical features, diagnosis, and referral of patients with breast abnormalities in primary health care settings in rural Ethiopia: a retrospective record analysis
Source: Research Square preprint supplement (doi:10.21203/rs.3.rs-6202235/v1), 2025-05-06
Supplement: Supplementary file 1 [file f1442f53d591fa41cf2a8e41.docx]

## Additional File 1

| **Name of PHC** | **Catchment population of health facility** | **Total number of women visiting adult OPD** | **Number of breast-related complaints in the registry** | **Number of cases reviewed from the patients’ records** |
| --- | --- | --- | --- | --- |
| Garo Gudo Health Center | 37,969 | 4,000 | 4 | 3 |
| Tome Gerara Health Center | 20,194 | 4,500 | 10 | 5 |
| Arsho Health Center | 24,140 | 5,030 | 12 | 10 |
| Bezena Health Center | 43,342 | 9,800 | 6 | 4 |
| Worabe Health Center | 80,072 | 19,752 | 30 | 27 |
| Angacha Health Center | 21,712 | 4,500 | 6 | 6 |
| Adulala Health Center | 33,173 | 3,380 | 10 | 10 |
| Asela Health Center | 44,995 | 20,000 | 28 | 24 |
| Cheleleka Health Center | 40,000 | 22,913 | 11 | 10 |
| Dembel Health Center | 4,911 | 9,870 | 23 | 22 |
| Shurmo Health Center | 24,542 | 5,030 | 10 | 7 |
| Dubo Primary Hospital | 270,068 | 23,000 | 40 | 15 |
| Angacha Primary Hospital | 131,250 | 5,708 | 20 | 16 |
| Atat Primary Hospital | 32,095 | 34,398 | 151 | 114 |
| Enseno Health Center | 33,162 | 9,424 | 21 | 19 |
| Hole Health Center | 24,798 | 9,151 | 5 | 3 |
| Korke Health Center | 32,840 | 10,291 | 49 | 47 |
| **Total** |  | **190,517** | **436** | **335** |

Table 1. Characteristics of health facilities in terms of OPD patient flow and breast-related

complaints, 2022
